# Supplementary material for: ATP and luciferase assays to determine the rate of drug action in in vitro cultures of Plasmodium falciparum
Source: PubMed Central journal article supplement (PMC3505462; doi:10.1186/1475-2875-11-369), 2012-11-07
Supplement: 1475-2875-11-369-S2.pdf [file 1475-2875-11-369-S2.pdf]

#### Additional file 4

**Table 1: IC<sub>50</sub> values of compounds used in this study.** IC<sub>50</sub> values were obtained by incubating *P. falciparum* 3D7 cultures with serial dilutions of the test compounds for 48 hours and assessing parasite viability using the parasite lactate dehydrogenase (pLDH) assay. Values are shown as averages ± standard deviation for three independent determinations. IC<sub>50</sub> values for lactacystin and MG-132 were determined on a single occasion against luciferase-expressing parasites.

| <b>Compound</b> | <b>IC<sub>50</sub></b> |
|-----------------|------------------------|
| Chloroquine     | 15.9 nM ±4.8           |
| DFMO            | 1.9 mM ±0.6            |
| Mefloquine      | 16.2 nM ±3.6           |
| Artemisinin     | 20.5 nM ±6.5           |
| Gramicidin      | 0.022 nM<br>±0.001     |
| Ritonavir       | 14.2 μM ±0.7           |
| Lactacystin     | 0.84 μM                |
| MG-132          | 58.5 nM                |
